# Supplementary material for: Effectiveness of a digital intervention versus alcohol information for online help-seekers in Sweden: a randomised controlled trial
Source: Springer Nature journal article supplement (doi:10.1186/s12916-022-02374-5), 2022-05-17
Supplement: MOESM2 [file 20422198]

# EFFECTIVENESS OF A DIGITAL INTERVENTION VERSUS ALCOHOL INFORMATION FOR ONLINE HELP-SEEKERS IN SWEDEN: A RANDOMISED CONTROLLED TRIAL

## ADDITIONAL FILE 2

### BASELINE QUESTIONNAIRE

1. Sex:
  - a. Female
  - b. Male
  
2. Civil status:
  - a. Living alone without kids at home
  - b. Living alone with kids at home
  - c. Living with somebody without kids
  - d. Living with somebody with kids
  - e. Have a partner but not living together
  
3. Age (numerical measure)
  
4. How many standard drinks did you consume last week? (numerical measure)
  
5. How often, during the past month, have you consumed four/five (female/male) or more standard drinks on one occasion? (numerical measure)
  
6. How confident are you that you will be able to reduce your alcohol consumption? (10-point scale ranging from 1 = "Not at all" to 10 = "Very confident")
  
7. How important is it for you to reduce your alcohol consumption? (10-point scale ranging from 1 = "Not important" to 10 = "Very important")
  
8. How well do you know how to reduce your alcohol consumption? (10-point scale ranging from 1 = "Not well at all" to 10 = "Very well")

Note: Participants are reminded of the definition of a standard drink by graphical means.
